# Supplementary material for: Assessing quality of life in patients with prostate cancer: a systematic and standardized comparison of available instruments
Source: Springer Nature journal article supplement (doi:10.1007/s11136-014-0678-8), 2014-04-18
Supplement: MOESM1 [file 281540]

**Online Appendix 1.** Specific search terminology for each instrument that was used in the systematic literature reviews.

|                                                                                                                                                                                                                                                                                                                                                                                                                                                                                                                                                                                                                                                                                                                                                                                                                                                                                                                                                                                                                                                                                                                                                                                                                                                                            |
|----------------------------------------------------------------------------------------------------------------------------------------------------------------------------------------------------------------------------------------------------------------------------------------------------------------------------------------------------------------------------------------------------------------------------------------------------------------------------------------------------------------------------------------------------------------------------------------------------------------------------------------------------------------------------------------------------------------------------------------------------------------------------------------------------------------------------------------------------------------------------------------------------------------------------------------------------------------------------------------------------------------------------------------------------------------------------------------------------------------------------------------------------------------------------------------------------------------------------------------------------------------------------|
| <p><b>Estudio sobre la Calidad de Vida en el Cáncer de Próstata – ESCAP-CDV</b></p> <p>((("urologic neoplasms"[MeSH Terms] OR ("urologic"[All Fields] AND "neoplasms"[All Fields]) OR "urologic neoplasms"[All Fields]) OR ("prostatic neoplasms"[MeSH Terms] OR ("prostatic"[All Fields] AND "neoplasms"[All Fields]) OR "prostatic neoplasms"[All Fields] OR ("prostate"[All Fields] AND "cancer"[All Fields]) OR "prostate cancer"[All Fields])) AND ("quality of life"[MeSH Terms] OR ("quality"[All Fields] AND "life"[All Fields]) OR "quality of life"[All Fields]) AND ((Estudio[All Fields] AND sobre[All Fields] AND la[All Fields] AND Calidad[All Fields] AND ("drug effects"[Subheading] OR ("drug"[All Fields] AND "effects"[All Fields]) OR "drug effects"[All Fields] OR "de"[All Fields]) AND Vida[All Fields] AND ("enzymology"[Subheading] OR "enzymology"[All Fields] OR "en"[All Fields]) AND el[All Fields] AND ("neoplasms"[MeSH Terms] OR "neoplasms"[All Fields] OR "cancer"[All Fields]) AND ("drug effects"[Subheading] OR ("drug"[All Fields] AND "effects"[All Fields]) OR "drug effects"[All Fields] OR "de"[All Fields]) AND ("prostate"[MeSH Terms] OR "prostate"[All Fields] OR "prostata"[All Fields])) OR "ESCAP-CDV"[All Fields]))</p> |
| <p><b>European Organisation for Research and Treatment of Cancer - Quality of Life - Prostate Cancer Module – EORTC-QLQ PR25</b></p> <p>((("urologic neoplasms"[MeSH Terms] OR ("urologic"[All Fields] AND "neoplasms"[All Fields]) OR "urologic neoplasms"[All Fields]) OR ("prostatic neoplasms"[MeSH Terms] OR ("prostatic"[All Fields] AND "neoplasms"[All Fields]) OR "prostatic neoplasms"[All Fields] OR ("prostate"[All Fields] AND "cancer"[All Fields]) OR "prostate cancer"[All Fields])) AND ("quality of life"[MeSH Terms] OR ("quality"[All Fields] AND "life"[All Fields]) OR "quality of life"[All Fields]) AND ("EORTC"[All Fields] OR "European Organisation for Research and Treatment of Cancer"[All Fields]))</p>                                                                                                                                                                                                                                                                                                                                                                                                                                                                                                                                     |
| <p><b>Expanded Prostate Cancer Index Composite – EPIC</b></p> <p>((("urologic neoplasms"[MeSH Terms] OR ("urologic"[All Fields] AND "neoplasms"[All Fields]) OR "urologic neoplasms"[All Fields]) OR ("prostatic neoplasms"[MeSH Terms] OR ("prostatic"[All Fields] AND "neoplasms"[All Fields]) OR "prostatic neoplasms"[All Fields] OR ("prostate"[All Fields] AND "cancer"[All Fields]) OR "prostate cancer"[All Fields])) AND (EPIC[All Fields] OR (expanded[All Fields] AND ("prostatic neoplasms"[MeSH Terms] OR ("prostatic"[All Fields] AND "neoplasms"[All Fields]) OR "prostatic neoplasms"[All Fields] OR ("prostate"[All Fields] AND "cancer"[All Fields]) OR "prostate cancer"[All Fields]) AND ("abstracting and indexing as topic"[MeSH Terms] OR ("abstracting"[All Fields] AND "indexing"[All Fields] AND "topic"[All Fields]) OR "abstracting and indexing as topic"[All Fields] OR "index"[All Fields]) AND composite[All Fields]))</p>                                                                                                                                                                                                                                                                                                                 |
| <p><b>Functional Assessment of Cancer Therapy - Prostate Cancer Module – FACT-P</b></p> <p>((("urologic neoplasms"[MeSH Terms] OR ("urologic"[All Fields] AND "neoplasms"[All Fields]) OR "urologic neoplasms"[All Fields]) OR ("prostatic neoplasms"[MeSH Terms] OR ("prostatic"[All Fields] AND "neoplasms"[All Fields]) OR "prostatic neoplasms"[All Fields] OR ("prostate"[All Fields] AND "cancer"[All Fields]) OR "prostate cancer"[All Fields])) AND ("quality of life"[MeSH Terms] OR ("quality"[All Fields] AND "life"[All Fields]) OR "quality of life"[All Fields]) AND ("FACT"[All Fields] OR "functional assessment of cancer therapy"[All Fields]))</p>                                                                                                                                                                                                                                                                                                                                                                                                                                                                                                                                                                                                      |

**Patient-Oriented Prostate Utility Scale – PORPUS**

("urologic neoplasms"[MeSH Terms] OR ("urologic"[All Fields] AND "neoplasms"[All Fields]) OR "urologic neoplasms"[All Fields]) OR ("prostatic neoplasms"[MeSH Terms] OR ("prostatic"[All Fields] AND "neoplasms"[All Fields]) OR "prostatic neoplasms"[All Fields] OR ("prostate"[All Fields] AND "cancer"[All Fields]) OR "prostate cancer"[All Fields])) AND (PORPUS[All Fields] OR "patient-oriented prostate utility scale"[All Fields])

**Prostate Cancer Quality of Life Instrument – PC-QoL**

("urologic neoplasms"[MeSH Terms] OR ("urologic"[All Fields] AND "neoplasms"[All Fields]) OR "urologic neoplasms"[All Fields]) OR ("prostatic neoplasms"[MeSH Terms] OR ("prostatic"[All Fields] AND "neoplasms"[All Fields]) OR "prostatic neoplasms"[All Fields] OR ("prostate"[All Fields] AND "cancer"[All Fields]) OR "prostate cancer"[All Fields])) AND ("quality of life"[MeSH Terms] OR ("quality"[All Fields] AND "life"[All Fields]) OR "quality of life"[All Fields]) AND (PC-QoL[All Fields] OR PCQoL[All Fields] OR ("prostatic neoplasms"[MeSH Terms] OR ("prostatic"[All Fields] AND "neoplasms"[All Fields]) OR "prostatic neoplasms"[All Fields] OR ("prostate"[All Fields] AND "cancer"[All Fields]) OR "prostate cancer"[All Fields]) AND ("quality of life"[MeSH Terms] OR ("quality"[All Fields] AND "life"[All Fields]) OR "quality of life"[All Fields]) AND instrument[All Fields]))

**Prostate Cancer Symptom Indices – PCSI**

("urologic neoplasms"[MeSH Terms] OR ("urologic"[All Fields] AND "neoplasms"[All Fields]) OR "urologic neoplasms"[All Fields]) OR ("prostatic neoplasms"[MeSH Terms] OR ("prostatic"[All Fields] AND "neoplasms"[All Fields]) OR "prostatic neoplasms"[All Fields] OR ("prostate"[All Fields] AND "cancer"[All Fields]) OR "prostate cancer"[All Fields])) AND ("quality of life"[MeSH Terms] OR ("quality"[All Fields] AND "life"[All Fields]) OR "quality of life"[All Fields]) AND (TALCOTT[All Fields] OR (TALCOTT[All Fields] AND instrument[All Fields]) OR (TALCOTT[All Fields] AND ("weights and measures"[MeSH Terms] OR ("weights"[All Fields] AND "measures"[All Fields]) OR "weights and measures"[All Fields] OR "scale"[All Fields])) OR (TALCOTT[All Fields] AND ("questionnaires"[MeSH Terms] OR "questionnaires"[All Fields] OR "questionnaire"[All Fields])))

**University of California, Los Angeles - Prostate Cancer Index – UCLA-PCI**

("urologic neoplasms"[MeSH Terms] OR ("urologic"[All Fields] AND "neoplasms"[All Fields]) OR "urologic neoplasms"[All Fields]) OR ("prostatic neoplasms"[MeSH Terms] OR ("prostatic"[All Fields] AND "neoplasms"[All Fields]) OR "prostatic neoplasms"[All Fields] OR ("prostate"[All Fields] AND "cancer"[All Fields]) OR "prostate cancer"[All Fields])) AND ("quality of life"[MeSH Terms] OR ("quality"[All Fields] AND "life"[All Fields]) OR "quality of life"[All Fields]) AND (UCLA-PCI[All Fields] OR (("universities"[MeSH Terms] OR "universities"[All Fields] OR "university"[All Fields]) AND ("california"[MeSH Terms] OR "california"[All Fields]) AND ("los angeles"[MeSH Terms] OR ("los"[All Fields] AND "angeles"[All Fields]) OR "los angeles"[All Fields]) AND ("prostatic neoplasms"[MeSH Terms] OR ("prostatic"[All Fields] AND "neoplasms"[All Fields]) OR "prostatic neoplasms"[All Fields] OR ("prostate"[All Fields] AND "cancer"[All Fields]) OR "prostate cancer"[All Fields]) AND ("abstracting and indexing as topic"[MeSH Terms] OR ("abstracting"[All Fields] AND "indexing"[All Fields] AND "topic"[All Fields]) OR "abstracting and indexing as topic"[All Fields] OR "index"[All Fields])) OR "prostate cancer index"[All Fields]))
